# Supplementary material for: Long non-coding RNA crnde promotes deep vein thrombosis by sequestering miR-181a-5p away from thrombogenic Pcyox1l
Source: Thromb J. 2023 Apr 19;21:44. doi: 10.1186/s12959-023-00480-9 (PMC10116699; doi:10.1186/s12959-023-00480-9)
Supplement: Supplementary file 4 — Supplementary Material 4 [file 12959_2023_480_MOESM4_ESM.xlsx]

## Sheet: Table S3
Table S3. Differential expression of miRNAs in three databases
CRNDE(RNAinter)	PCYOXIL(RNAinter)	PCYOXIL(mirwalk)
miR-384	let-7d-5p	let-7g-5p
miR-136-5p	let-7i-5p	let-7g-3p
miR-217-5p	let-7a-5p	let-7i-5p
miR-145-5p	let-7e-5p	let-7i-3p
miR-451a	let-7b-5p	miR-1a-1-5p
miR-181a-5p	let-7f-5p	miR-15b-5p
miR-145a-5p	let-7c-5p	miR-23b-5p
miR-384-3p	let-7g-5p	miR-30a-3p
miR-217-3p	miR-193b-3p	miR-99a-5p
miR-186-5p	miR-204-5p	miR-99a-3p
miR-144-3p	miR-211-5p	miR-99b-5p
miR-1277-5p	miR-219a-5p	miR-99b-3p
miR-30d-3p	miR-107	miR-101a-5p
miR-4666a-3p	miR-103a-3p	miR-124-5p
miR-548a-3p	miR-101-3p	miR-124-3p
miR-548e-3p	miR-6817-5p	miR-125a-5p
miR-6813-3p	miR-5002-3p	miR-125a-3p
miR-1290	miR-181a-5p	miR-125b-5p
miR-30e-3p	miR-181c-3p	miR-125b-2-3p
miR-4714-3p	miR-4662a-3p	miR-126a-5p
miR-548ar-3p	miR-4684-5p	miR-127-3p
miR-548f-3p	miR-346	miR-128-1-5p
miR-212-5p	miR-15b-5p	miR-132-5p
miR-3617-5p	miR-196a-5p	miR-132-3p
miR-543	miR-495-3p	miR-133a-3p
miR-548az-3p	miR-876-5p	miR-134-3p
miR-549a-3p	miR-873-5p	miR-135a-5p
	miR-135a-5p	miR-135a-1-3p
	miR-16-5p	miR-138-5p
	miR-196b-5p	miR-140-5p
	miR-497-5p	miR-140-3p
	miR-187-3p	miR-141-5p
	miR-135b-5p	miR-149-5p
	miR-193a-3p	miR-149-3p
	miR-28-5p	miR-150-5p
	miR-499a-5p	miR-150-3p
	miR-296-3p	miR-151-5p
	miR-15a-5p	miR-151-3p
	miR-195-5p	miR-152-5p
	miR-424-5p	miR-153-5p
	miR-708-5p	miR-155-5p
	miR-98-5p	miR-155-3p
	miR-4778-3p	miR-10b-5p
	miR-5010-5p	miR-129-5p
	miR-623	miR-181a-5p
	miR-6729-5p	miR-181a-2-3p
	miR-6893-5p	miR-183-3p
	miR-1324	miR-184-5p
	miR-3912-5p	miR-185-5p
	miR-4447	miR-185-3p
	miR-4538	miR-187-5p
	miR-541-3p	miR-187-3p
	miR-627-3p	miR-188-5p
	miR-6836-3p	miR-188-3p
	miR-1233-5p	miR-24-3p
	miR-3152-5p	miR-191-5p
	miR-4279	miR-191-3p
	miR-4453	miR-194-1-3p
	miR-4659b-3p	miR-195a-3p
	miR-5087	miR-201-5p
	miR-6077	miR-202-3p
	miR-6766-3p	miR-203-5p
	miR-1236-3p	miR-204-5p
	miR-29b-1-5p	miR-205-5p
	miR-4502	miR-205-3p
	miR-4753-3p	miR-206-5p
	miR-5001-3p	miR-207
	miR-555	miR-143-5p
	miR-6511a-5p	miR-290a-5p
	miR-6868-3p	miR-290a-3p
	miR-1270	miR-292a-5p
	miR-3674	miR-292a-3p
	miR-432-5p	miR-293-3p
	miR-4456	miR-294-5p
	miR-4472	miR-296-5p
	miR-4755-5p	miR-296-3p
	miR-5692a	miR-298-5p
	miR-654-5p	miR-298-3p
	miR-6875-3p	miR-300-3p
	miR-1275	miR-34c-5p
	miR-3679-3p	miR-34b-5p
	miR-4432	let-7d-5p
	miR-5088-3p	let-7d-3p
	miR-620	miR-106a-5p
	miR-6778-5p	miR-106b-5p
	miR-122-5p	miR-106b-3p
	miR-1251-5p	miR-19b-2-5p
	miR-149-5p	miR-30c-1-3p
		miR-30d-3p
		miR-148a-5p
		miR-192-3p
		miR-208a-5p
		miR-208a-3p
		let-7a-5p
		let-7a-2-3p
		let-7b-5p
		let-7c-5p
		let-7c-1-3p
		let-7e-5p
		let-7f-5p
		miR-16-1-3p
		miR-18a-5p
		miR-20a-5p
		miR-21a-3p
		miR-23a-5p
		miR-26a-5p
		miR-27a-5p
		miR-31-5p
		miR-92a-3p
		miR-93-3p
		miR-34a-5p
		miR-34a-3p
		miR-129-2-3p
		miR-103-3p
		miR-103-2-5p
		miR-322-5p
		miR-323-5p
		miR-323-3p
		miR-324-5p
		miR-324-3p
		miR-325-5p
		miR-325-3p
		miR-326-5p
		miR-326-3p
		miR-328-5p
		miR-328-3p
		miR-329-5p
		miR-329-3p
		miR-330-5p
		miR-330-3p
		miR-331-5p
		miR-331-3p
		miR-337-5p
		miR-148b-5p
		miR-148b-3p
		miR-338-5p
		miR-339-5p
		miR-339-3p
		miR-340-3p
		miR-341-5p
		miR-342-5p
		miR-344-5p
		miR-344-3p
		miR-345-3p
		miR-346-5p
		miR-346-3p
		miR-350-3p
		miR-351-5p
		miR-351-3p
		miR-135b-3p
		miR-1a-2-5p
		miR-107-5p
		miR-107-3p
		miR-10a-5p
		miR-17-5p
		miR-17-3p
		miR-25-3p
		miR-28a-5p
		miR-100-5p
		miR-139-3p
		miR-200c-5p
		miR-210-5p
		miR-210-3p
		miR-212-5p
		miR-212-3p
		miR-181a-1-3p
		miR-214-5p
		miR-214-3p
		miR-216a-5p
		miR-218-1-3p
		miR-223-3p
		miR-320-5p
		miR-26a-2-3p
		miR-211-5p
		miR-211-3p
		miR-221-3p
		miR-222-3p
		miR-224-3p
		miR-29b-2-5p
		miR-135a-2-3p
		miR-138-1-3p
		miR-125b-1-3p
		miR-128-2-5p
		miR-7b-3p
		miR-194-2-3p
		miR-219a-2-3p
		miR-361-3p
		miR-375-5p
		miR-375-3p
		miR-376a-5p
		miR-377-5p
		miR-378a-5p
		miR-378a-3p
		miR-379-5p
		miR-381-5p
		miR-381-3p
		miR-382-5p
		miR-382-3p
		miR-383-5p
		miR-383-3p
		miR-133b-5p
		miR-133b-3p
		miR-215-3p
		miR-196b-3p
		miR-410-5p
		miR-376b-5p
		miR-376b-3p
		miR-411-3p
		miR-412-5p
		miR-370-5p
		miR-431-5p
		miR-431-3p
		miR-433-5p
		miR-433-3p
		miR-448-5p
		miR-365-2-5p
		miR-451a
		miR-452-5p
		miR-467a-5p
		miR-470-5p
		miR-532-3p
		miR-485-5p
		miR-486a-5p
		miR-546
		miR-540-5p
		miR-540-3p
		miR-543-5p
		miR-541-5p
		miR-542-5p
		miR-494-5p
		miR-494-3p
		miR-487b-5p
		miR-487b-3p
		miR-20b-5p
		miR-20b-3p
		miR-450a-2-3p
		miR-503-5p
		miR-291b-5p
		miR-302c-5p
		miR-302c-3p
		miR-1224-5p
		miR-1247-3p
		miR-301b-5p
		miR-675-5p
		miR-675-3p
		miR-744-5p
		miR-758-5p
		miR-758-3p
		miR-551b-5p
		miR-551b-3p
		miR-1249-5p
		miR-671-5p
		miR-671-3p
		miR-668-5p
		miR-668-3p
		miR-1843a-5p
		miR-665-3p
		miR-770-5p
		miR-770-3p
		miR-762
		miR-3475-3p
		miR-802-3p
		miR-672-5p
		miR-670-5p
		miR-670-3p
		miR-1298-3p
		miR-761
		miR-764-5p
		miR-764-3p
		miR-3059-5p
		miR-3059-3p
		miR-3058-3p
		miR-3099-5p
		miR-3099-3p
		miR-3106-3p
		miR-344d-1-5p
		miR-666-5p
		miR-666-3p
		miR-759
		miR-496a-5p
		miR-496a-3p
		miR-673-5p
		miR-673-3p
		miR-760-5p
		miR-760-3p
		miR-674-5p
		miR-674-3p
		miR-677-3p
		miR-678
		miR-497a-3p
		miR-423-5p
		miR-679-5p
		miR-495-5p
		miR-680
		miR-681
		miR-682
		miR-449c-5p
		miR-449c-3p
		miR-683
		miR-684
		miR-686
		miR-719
		miR-688
		miR-690
		miR-691
		miR-692
		miR-693-3p
		miR-146b-3p
		miR-467b-5p
		miR-695
		miR-455-5p
		miR-455-3p
		miR-491-5p
		miR-698-5p
		miR-698-3p
		miR-700-5p
		miR-701-5p
		miR-702-5p
		miR-702-3p
		miR-703
		miR-704
		miR-707
		miR-708-3p
		miR-709
		miR-710
		miR-711
		miR-712-5p
		miR-713
		miR-500-3p
		miR-501-3p
		miR-505-5p
		miR-718
		miR-652-5p
		miR-652-3p
		miR-490-5p
		miR-490-3p
		miR-615-5p
		miR-615-3p
		miR-804
		miR-741-3p
		miR-742-5p
		miR-742-3p
		miR-743a-5p
		miR-181d-5p
		miR-181d-3p
		miR-871-5p
		miR-871-3p
		miR-879-5p
		miR-881-5p
		miR-883b-5p
		miR-874-5p
		miR-874-3p
		miR-876-5p
		miR-193b-5p
		miR-193b-3p
		miR-343
		miR-453
		miR-465c-5p
		miR-493-3p
		miR-504-3p
		miR-574-5p
		miR-92b-5p
		miR-92b-3p
		miR-449b
		miR-872-3p
		miR-873a-3p
		miR-877-5p
		miR-877-3p
		miR-511-5p
		miR-544-5p
		miR-544-3p
		miR-598-5p
		miR-653-3p
		miR-582-5p
		miR-669g
		miR-669f-5p
		miR-669h-5p
		miR-1188-5p
		miR-466j
		miR-1192
		miR-1193-3p
		miR-669e-5p
		miR-1195
		miR-1197-5p
		miR-1197-3p
		miR-1199-5p
		miR-1199-3p
		miR-1902
		miR-1905
		miR-1895
		miR-1903
		miR-1899
		miR-1900
		miR-1892
		miR-1906
		miR-1896
		miR-1898
		miR-1907
		miR-1894-5p
		miR-1894-3p
		miR-1893
		miR-1901
		miR-1927
		miR-1929-3p
		miR-1930-3p
		miR-1931
		miR-1932
		miR-1933-3p
		miR-1934-5p
		miR-1934-3p
		miR-1936
		miR-1941-5p
		miR-1941-3p
		miR-1943-5p
		miR-1943-3p
		miR-1945
		miR-1306-5p
		miR-1306-3p
		miR-1946a
		miR-1947-5p
		miR-1947-3p
		miR-1948-3p
		miR-1951
		miR-1954
		miR-669n
		miR-1956
		miR-1962
		miR-1963
		miR-1964-5p
		miR-1964-3p
		miR-1966-5p
		miR-1966-3p
		miR-1967
		miR-1968-5p
		miR-1968-3p
		miR-1971
		miR-1983
		miR-1839-5p
		miR-1839-3p
		miR-1981-5p
		miR-1982-5p
		miR-2136
		miR-2137
		miR-2139
		miR-2183
		miR-432
		miR-664-5p
		miR-2861
		miR-3057-5p
		miR-3057-3p
		miR-1251-5p
		miR-3060-3p
		miR-3061-5p
		miR-3063-5p
		miR-3063-3p
		miR-3064-5p
		miR-3065-3p
		miR-3067-5p
		miR-3067-3p
		miR-3069-5p
		miR-3070-5p
		miR-3070-3p
		miR-3072-5p
		miR-3072-3p
		miR-3073a-3p
		miR-3076-5p
		miR-3077-5p
		miR-3077-3p
		miR-3078-5p
		miR-3078-3p
		miR-3081-5p
		miR-3081-3p
		miR-3082-5p
		miR-3082-3p
		miR-3083-3p
		miR-3084-5p
		miR-3084-3p
		miR-3085-5p
		miR-3085-3p
		miR-3086-5p
		miR-466n-3p
		miR-3087-5p
		miR-3088-3p
		miR-3089-5p
		miR-3089-3p
		miR-3090-5p
		miR-3090-3p
		miR-3091-5p
		miR-3091-3p
		miR-3092-3p
		miR-3093-5p
		miR-3093-3p
		miR-3094-5p
		miR-3095-5p
		miR-3098-5p
		miR-3100-3p
		miR-3101-3p
		miR-344e-5p
		miR-344b-5p
		miR-344b-3p
		miR-344c-5p
		miR-344c-3p
		miR-344g-3p
		miR-344f-5p
		miR-344f-3p
		miR-3102-5p
		miR-3102-5p.2-5p
		miR-3102-3p.2-3p
		miR-3102-3p
		miR-3103-5p
		miR-3103-3p
		miR-3104-5p
		miR-3105-5p
		miR-3105-3p
		miR-486b-5p
		miR-3074-2-3p
		miR-3108-5p
		miR-3109-5p
		miR-3109-3p
		miR-3110-5p
		miR-374c-5p
		miR-3112-5p
		miR-1912-5p
		miR-3113-5p
		miR-3113-3p
		miR-3470a
		miR-3470b
		miR-3472
		miR-3474
		miR-3960
		miR-3961
		miR-28c
		miR-378b
		miR-3968
		miR-3971
		miR-3473b
		miR-5046
		miR-5103
		miR-5106
		miR-5107-5p
		miR-5110
		miR-5112
		miR-5113
		miR-5118
		miR-5119
		miR-5120
		miR-5122
		miR-5123
		miR-5125
		miR-3572-5p
		miR-3572-3p
		miR-5126
		miR-5129-5p
		miR-5131
		miR-5132-5p
		miR-5133
		miR-5134-5p
		miR-5134-3p
		miR-5135
		miR-3544-3p
		miR-299b-3p
		miR-1231-5p
		miR-1231-3p
		miR-5616-3p
		miR-5617-3p
		miR-5618-5p
		miR-5620-5p
		miR-5621-5p
		miR-5621-3p
		miR-5622-3p
		miR-5623-5p
		miR-5623-3p
		miR-3073b-5p
		miR-5626-5p
		miR-344h-5p
		miR-344h-3p
		miR-5627-5p
		miR-5627-3p
		miR-344i
		miR-5709-3p
		miR-6236
		miR-6237
		miR-6238
		miR-6239
		miR-6240
		miR-6241
		miR-6244
		miR-195b
		miR-133c
		miR-6337
		miR-6338
		miR-6339
		miR-6340
		miR-6346
		miR-6347
		miR-6348
		miR-6349
		miR-6350
		miR-6351
		miR-6353
		miR-6356
		miR-6357
		miR-6358
		miR-6359
		miR-6360
		miR-6361
		miR-145b
		miR-6366
		miR-6367
		miR-6368
		miR-6370
		miR-6371
		miR-6374
		miR-6375
		miR-6378
		miR-6379
		miR-6381
		miR-6383
		miR-6385
		miR-6386
		miR-6387
		miR-6388
		miR-5124b
		miR-6391
		miR-6392-5p
		miR-6392-3p
		miR-6393
		miR-6394
		miR-6395
		miR-6396
		miR-6397
		miR-6400
		miR-6401
		miR-6402
		miR-6403
		miR-6404
		miR-6405
		miR-496b
		miR-6407
		miR-6408
		miR-6409
		miR-6410
		miR-378d
		miR-6415
		miR-6417
		miR-6418-5p
		miR-6418-3p
		miR-451b
		let-7k
		miR-6537-5p
		miR-6537-3p
		miR-6538
		miR-6540-3p
		miR-3473e
		miR-6541
		miR-6896-5p
		miR-6896-3p
		miR-6897-5p
		miR-6897-3p
		miR-6898-5p
		miR-6899-5p
		miR-6899-3p
		miR-6900-5p
		miR-6901-5p
		miR-6901-3p
		miR-6902-3p
		miR-6903-3p
		miR-6904-5p
		miR-6906-5p
		miR-6906-3p
		miR-6907-5p
		miR-6908-5p
		miR-6908-3p
		miR-6909-5p
		miR-6909-3p
		miR-6910-5p
		miR-6911-5p
		miR-6911-3p
		miR-6912-5p
		miR-6913-5p
		miR-6913-3p
		miR-6914-5p
		miR-6914-3p
		miR-6915-5p
		miR-6915-3p
		miR-6916-5p
		miR-6916-3p
		miR-6917-5p
		miR-6917-3p
		miR-6918-3p
		miR-6919-5p
		miR-6919-3p
		miR-6920-3p
		miR-6921-5p
		miR-6921-3p
		miR-6922-5p
		miR-6922-3p
		miR-6923-5p
		miR-6923-3p
		miR-6924-5p
		miR-6924-3p
		miR-6925-3p
		miR-6926-5p
		miR-6927-5p
		miR-6927-3p
		miR-6928-5p
		miR-6929-5p
		miR-6929-3p
		miR-6930-5p
		miR-6930-3p
		miR-6931-5p
		miR-6931-3p
		miR-6932-3p
		miR-6933-5p
		miR-6933-3p
		miR-6934-5p
		miR-6935-5p
		miR-6936-5p
		miR-6936-3p
		miR-6937-3p
		miR-6938-3p
		miR-6939-5p
		miR-6940-5p
		miR-6940-3p
		miR-6941-5p
		miR-6941-3p
		miR-6942-5p
		miR-6943-5p
		miR-6944-5p
		miR-6944-3p
		miR-6945-5p
		miR-6945-3p
		miR-6946-3p
		miR-6947-5p
		miR-6947-3p
		miR-6949-3p
		miR-6950-5p
		miR-6952-5p
		miR-6953-5p
		miR-6954-5p
		miR-6954-3p
		miR-6955-5p
		miR-6955-3p
		miR-6956-5p
		miR-6957-3p
		miR-6958-5p
		miR-6958-3p
		miR-6959-5p
		miR-6959-3p
		miR-6960-3p
		miR-6961-5p
		miR-6961-3p
		miR-6962-3p
		miR-6963-5p
		miR-6963-3p
		miR-6964-5p
		miR-6965-5p
		miR-6965-3p
		miR-3547-5p
		miR-6966-5p
		miR-6966-3p
		miR-6968-5p
		miR-6968-3p
		miR-6969-3p
		miR-6970-5p
		miR-6970-3p
		miR-6971-5p
		miR-6972-5p
		miR-6973a-5p
		miR-6974-3p
		miR-6975-5p
		miR-6976-5p
		miR-6976-3p
		miR-6977-5p
		miR-6977-3p
		miR-6978-5p
		miR-6978-3p
		miR-6979-5p
		miR-6980-5p
		miR-6981-5p
		miR-6981-3p
		miR-6982-5p
		miR-6982-3p
		miR-6984-5p
		miR-6985-5p
		miR-6985-3p
		miR-6987-5p
		miR-6987-3p
		miR-6988-5p
		miR-6989-5p
		miR-6989-3p
		miR-6990-5p
		miR-6991-5p
		miR-6991-3p
		miR-6992-5p
		miR-6993-5p
		miR-6993-3p
		miR-6994-5p
		miR-6995-5p
		miR-6995-3p
		miR-6996-3p
		miR-6997-5p
		miR-6997-3p
		miR-6998-5p
		miR-6998-3p
		miR-6999-5p
		miR-6999-3p
		miR-7000-5p
		miR-7000-3p
		miR-7001-5p
		miR-7001-3p
		miR-7002-5p
		miR-6973b-5p
		miR-7003-5p
		miR-7003-3p
		miR-7004-5p
		miR-7005-5p
		miR-7005-3p
		miR-7006-5p
		miR-7007-5p
		miR-7008-5p
		miR-7008-3p
		miR-7009-5p
		miR-7009-3p
		miR-7010-5p
		miR-7010-3p
		miR-7011-5p
		miR-7011-3p
		miR-7012-5p
		miR-7012-3p
		miR-7013-3p
		miR-7014-5p
		miR-7015-5p
		miR-7015-3p
		miR-7016-5p
		miR-7016-3p
		miR-7017-5p
		miR-7018-5p
		miR-7019-5p
		miR-7019-3p
		miR-7020-5p
		miR-7020-3p
		miR-7021-5p
		miR-7021-3p
		miR-7022-5p
		miR-7022-3p
		miR-7023-5p
		miR-7023-3p
		miR-7024-5p
		miR-7024-3p
		miR-7025-5p
		miR-7025-3p
		miR-7026-5p
		miR-7026-3p
		miR-7027-5p
		miR-7027-3p
		miR-7028-5p
		miR-7029-5p
		miR-7029-3p
		miR-7030-5p
		miR-7030-3p
		miR-7031-5p
		miR-7032-5p
		miR-7032-3p
		miR-7033-5p
		miR-7033-3p
		miR-7034-5p
		miR-7034-3p
		miR-7035-5p
		miR-7035-3p
		miR-7036a-5p
		miR-7036a-3p
		miR-7037-5p
		miR-7038-5p
		miR-7038-3p
		miR-7039-5p
		miR-7039-3p
		miR-7040-5p
		miR-7041-3p
		miR-7042-5p
		miR-7043-5p
		miR-7044-5p
		miR-7044-3p
		miR-7045-5p
		miR-7045-3p
		miR-7046-5p
		miR-7046-3p
		miR-7047-5p
		miR-7048-5p
		miR-7049-5p
		miR-7049-3p
		miR-7050-3p
		miR-7051-5p
		miR-7051-3p
		miR-7052-5p
		miR-7052-3p
		miR-7053-5p
		miR-7053-3p
		miR-7054-5p
		miR-7054-3p
		miR-7055-5p
		miR-7055-3p
		miR-7056-5p
		miR-7057-5p
		miR-7058-5p
		miR-7059-5p
		miR-7059-3p
		miR-7062-5p
		miR-7062-3p
		miR-7063-5p
		miR-7063-3p
		miR-7064-5p
		miR-7064-3p
		miR-7065-5p
		miR-7065-3p
		miR-7066-5p
		miR-7066-3p
		miR-7067-5p
		miR-7067-3p
		miR-6769b-5p
		miR-6769b-3p
		miR-7068-5p
		miR-7068-3p
		miR-7069-5p
		miR-7069-3p
		miR-7070-5p
		miR-7070-3p
		miR-7071-5p
		miR-7071-3p
		miR-7072-3p
		miR-7074-5p
		miR-7075-5p
		miR-7075-3p
		miR-7076-5p
		miR-7077-5p
		miR-7077-3p
		miR-7079-5p
		miR-7080-5p
		miR-7080-3p
		miR-7081-5p
		miR-7081-3p
		miR-7082-5p
		miR-7082-3p
		miR-7083-5p
		miR-7084-5p
		miR-7084-3p
		miR-7085-5p
		miR-7085-3p
		miR-7086-5p
		miR-7087-5p
		miR-7088-5p
		miR-7088-3p
		miR-7089-5p
		miR-7089-3p
		miR-7090-5p
		miR-7091-5p
		miR-7091-3p
		miR-7094b-2-5p
		miR-7115-5p
		miR-7115-3p
		miR-7117-5p
		miR-7118-5p
		miR-7119-5p
		miR-7119-3p
		miR-7211-5p
		miR-7211-3p
		miR-7212-5p
		miR-7213-5p
		miR-7213-3p
		miR-7214-5p
		miR-7214-3p
		miR-7215-5p
		miR-7215-3p
		miR-7217-3p
		miR-7218-5p
		miR-7218-3p
		miR-7220-5p
		miR-7220-3p
		miR-7221-3p
		miR-7222-5p
		miR-7223-5p
		miR-7224-5p
		miR-7225-5p
		miR-7225-3p
		miR-7226-5p
		miR-7226-3p
		miR-7228-5p
		miR-7230-5p
		miR-7231-5p
		miR-7233-5p
		miR-7235-5p
		miR-7236-3p
		miR-7237-5p
		miR-7238-5p
		miR-7239-5p
		miR-7239-3p
		miR-7240-5p
		miR-7240-3p
		miR-7241-3p
		miR-7242-5p
		miR-7242-3p
		miR-7578
		miR-6546-5p
		miR-6546-3p
		miR-7646-5p
		miR-7646-3p
		miR-7647-5p
		miR-7647-3p
		miR-7648-5p
		miR-7648-3p
		miR-7649-5p
		miR-7649-3p
		miR-7650-5p
		miR-7651-5p
		miR-7651-3p
		miR-219b-5p
		miR-7036b-5p
		miR-7036b-3p
		miR-7652-5p
		miR-7652-3p
		miR-7653-5p
		miR-7654-5p
		miR-7654-3p
		miR-7655-5p
		miR-7655-3p
		miR-7656-3p
		miR-7658-5p
		miR-7658-3p
		miR-7660-5p
		miR-7662-3p
		miR-7663-5p
		miR-7663-3p
		miR-7665-5p
		miR-7665-3p
		miR-7666-5p
		miR-7667-5p
		miR-7667-3p
		miR-7668-3p
		miR-7669-3p
		miR-7670-5p
		miR-7671-5p
		miR-7671-3p
		miR-7672-5p
		miR-7672-3p
		miR-7673-5p
		miR-3569-5p
		miR-3569-3p
		miR-7674-5p
		miR-7676-3p
		miR-129b-3p
		miR-292b-5p
		miR-292b-3p
		miR-1191b-5p
		miR-1191b-3p
		miR-7677-5p
		miR-7677-3p
		miR-7678-5p
		miR-7678-3p
		miR-7679-5p
		miR-7679-3p
		miR-7680-3p
		miR-6715-5p
		miR-6715-3p
		miR-3620-5p
		miR-3620-3p
		miR-7681-5p
		miR-7681-3p
		miR-7682-3p
		miR-7683-5p
		miR-216c-3p
		miR-7684-5p
		miR-7684-3p
		miR-219c-5p
		miR-7685-3p
		miR-7686-5p
		miR-7686-3p
		miR-290b-5p
		miR-290b-3p
		miR-7687-5p
		miR-7687-3p
		miR-1258-5p
		miR-1258-3p
		miR-7688-5p
		miR-7688-3p
		miR-7689-5p
		miR-7689-3p
		miR-7243-3p
		miR-3473f
		miR-8090
		miR-8091
		miR-8092
		miR-8093
		miR-8095
		miR-8096
		miR-8097
		miR-8098
		miR-8099
		miR-8100
		miR-497b
		miR-8102
		miR-8103
		miR-8104
		miR-8105
		miR-8108
		miR-8109
		miR-8110
		miR-8112
		miR-8113
		miR-8114
		miR-8115
		miR-8116
		miR-8117
		miR-8119
		miR-3473g
		miR-3154
		miR-3552
		miR-935
		miR-9718
		miR-9768-5p
		miR-9769-3p
		miR-1271-3p
		miR-1911-5p
		miR-5104b-5p
		miR-12178-5p
		miR-12178-3p
		miR-12179-5p
		miR-12180-3p
		miR-12181-3p
		miR-12182-5p
		miR-203b-3p
		miR-12184-5p
		miR-12184-3p
		miR-12185-5p
		miR-12185-3p
		miR-12186-5p
		miR-12186-3p
		miR-12187-5p
		miR-1970b-5p
		miR-12188-5p
		miR-12188-3p
		miR-3083b-5p
		miR-3083b-3p
		miR-12190-3p
		miR-12191-5p
		miR-12191-3p
		miR-122b-3p
		miR-12192-5p
		miR-12193-5p
		miR-12193-3p
		miR-12194-3p
		miR-12195-5p
		miR-3473h-5p
		miR-12196-5p
		miR-12197-3p
		miR-12198-3p
		miR-12199-3p
		miR-12200-5p
		miR-12200-3p
		miR-12201-5p
		miR-12201-3p
		miR-12202-5p
		miR-12203-5p
		miR-12203-3p
		miR-1970c-5p
		miR-1970c-3p
		miR-12205-5p
		miR-12206-5p
